# Supplementary material for: Reconstitution of the complete rupture in musculotendinous junction using skeletal muscle-derived multipotent stem cell sheet-pellets as a “bio-bond”
Source: PeerJ. 2016 Jul 19;4:e2231. doi: 10.7717/peerj.2231 (PMC4957990; doi:10.7717/peerj.2231)

| | OP group | OP | OP | Cont | Cont | OP | Cont | | --- | --- | --- | --- | --- | --- | --- | | recovery term | tension (g) | N (1x102) | tension (g) | N (1x102) | muscle mass (mg) | muscle mass (mg) | | 17.5 | 54.9 | 53.802 | 89.2 | 87.416 | 49.8 | 51.2 | | 15 | 34.9 | 34.202 | 89.4 | 87.612 | 36.2 | 50.6 | | 16 | 47.3 | 46.354 | 89.4 | 87.612 | 40.1 | 50.6 | | 14 | 15.8 | 15.484 | 41.2 | 40.376 | 29.6 | 49.3 | | 5 | 33 | 32.34 | 87.7 | 85.946 | 38.5 | 54.9 | | 6.5 | 32.1 | 31.458 | 52.3 | 51.254 | 28.4 | 34.8 | | 8 | 32.7 | 32.046 | 46.3 | 45.374 | 35 | 46 | | 4 | 6.3 | 6.174 | 42.99 | 42.1302 | 13.9 | 52.3 |  | Control group |  |  |  | | --- | --- | --- | --- | | body mass | muscle mass (g) | tension (g) | N (1x102) | | 25 | 50.8 | 87.0 | 85.26 | | 32 | 51.7 | 69.7 | 68.35079 | | 33 | 53.9 | 76.8 | 75.26037 | | 40 | 50 | 86.6 | 84.8289 | | 41 | 51.4 | 86.7 | 84.97208 | |  |  |  |  |  |  |
| --- | --- | --- | --- | --- | --- | --- | --- | --- | --- | --- | --- | --- | --- | --- | --- | --- | --- | --- | --- | --- | --- | --- | --- | --- | --- | --- | --- | --- | --- | --- | --- | --- | --- | --- | --- | --- | --- | --- | --- | --- | --- | --- | --- | --- | --- | --- | --- | --- | --- | --- | --- | --- | --- | --- | --- | --- | --- | --- | --- | --- | --- | --- | --- | --- | --- | --- | --- | --- | --- | --- | --- | --- | --- | --- | --- | --- | --- | --- | --- | --- | --- | --- | --- | --- | --- | --- | --- | --- | --- | --- | --- | --- | --- | --- | --- | --- | --- | --- | --- | --- | --- | --- | --- | --- |

| RT-PCR 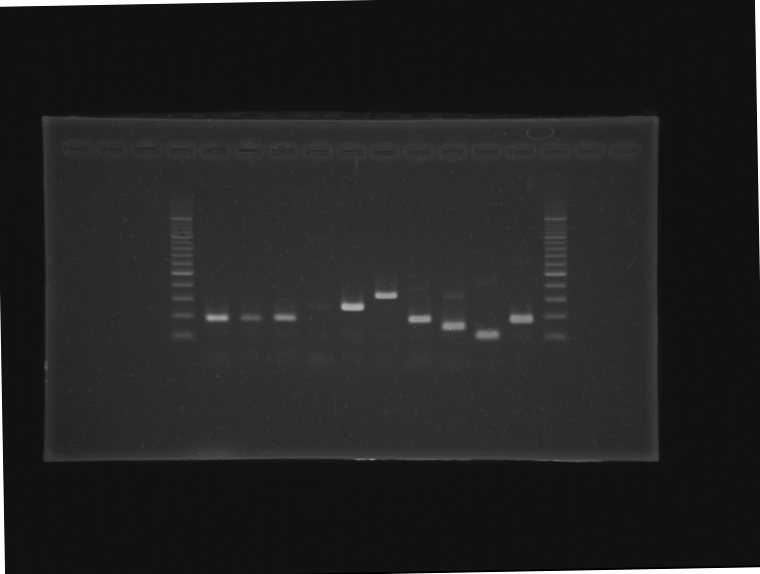 |  |  |  |  |  |  |
| --- | --- | --- | --- | --- | --- | --- |
| 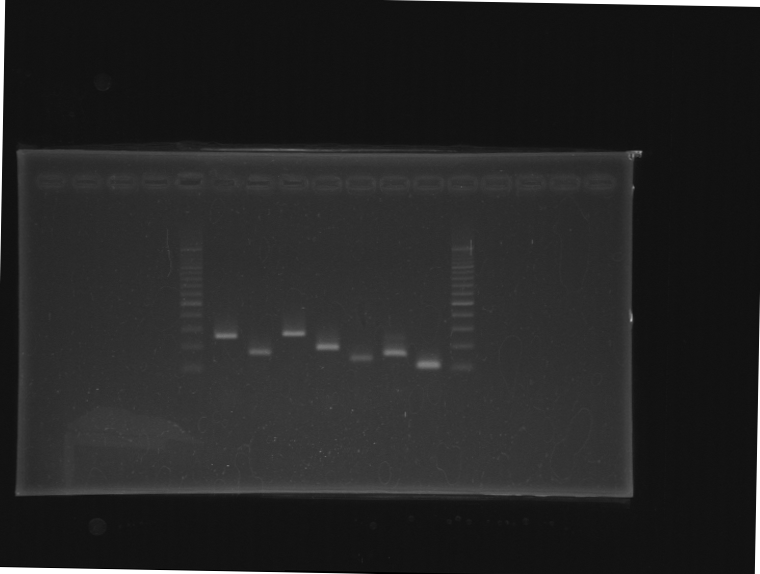 |  |  |  |  |  |  |
| 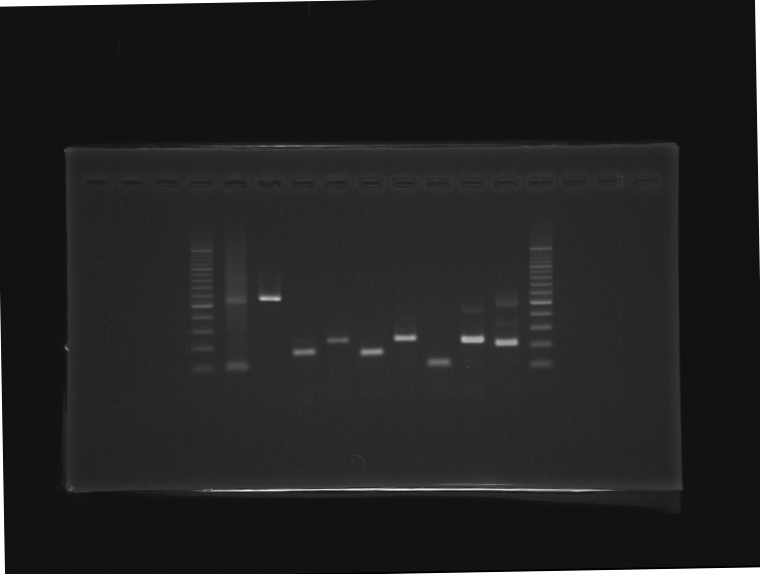 |  |  |  |  |  |  |
|  |  |  |  |  |  |  |
|  |  |  |  |  |  |  |
|  |  |  |  |  |  |  |
|  |  |  |  |  |  |  |
|  |  |  |  |  |  |  |
|  |  |  |  |  |  |  |
|  |  |  |  |  |  |  |
|  |  |  |  |  |  |  |
|  |  |  |  |  |  |  |


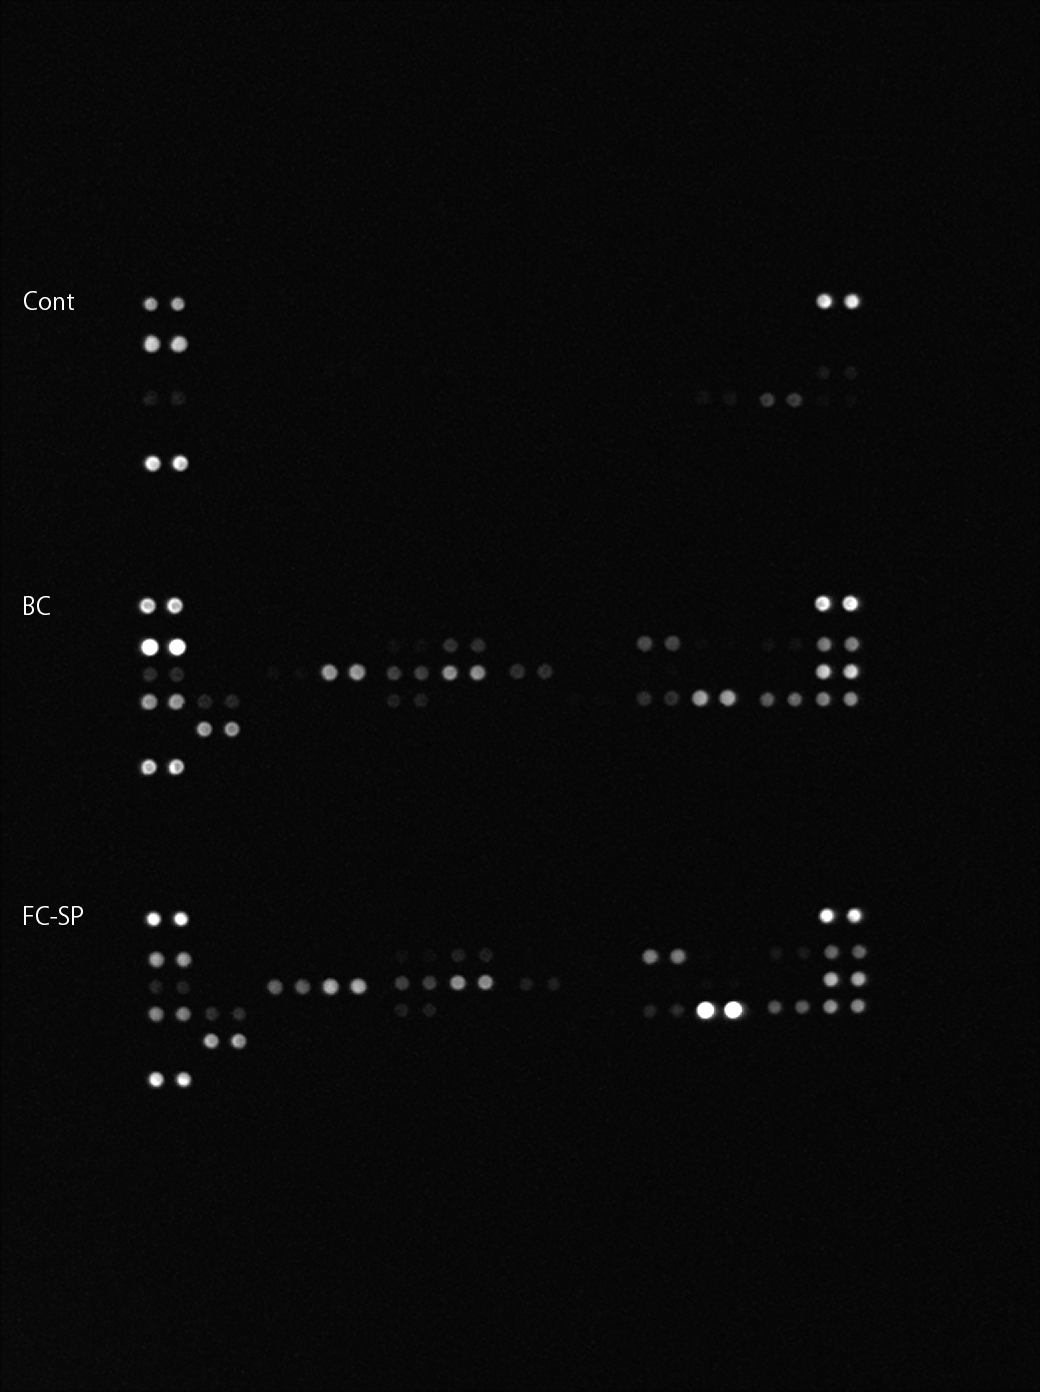

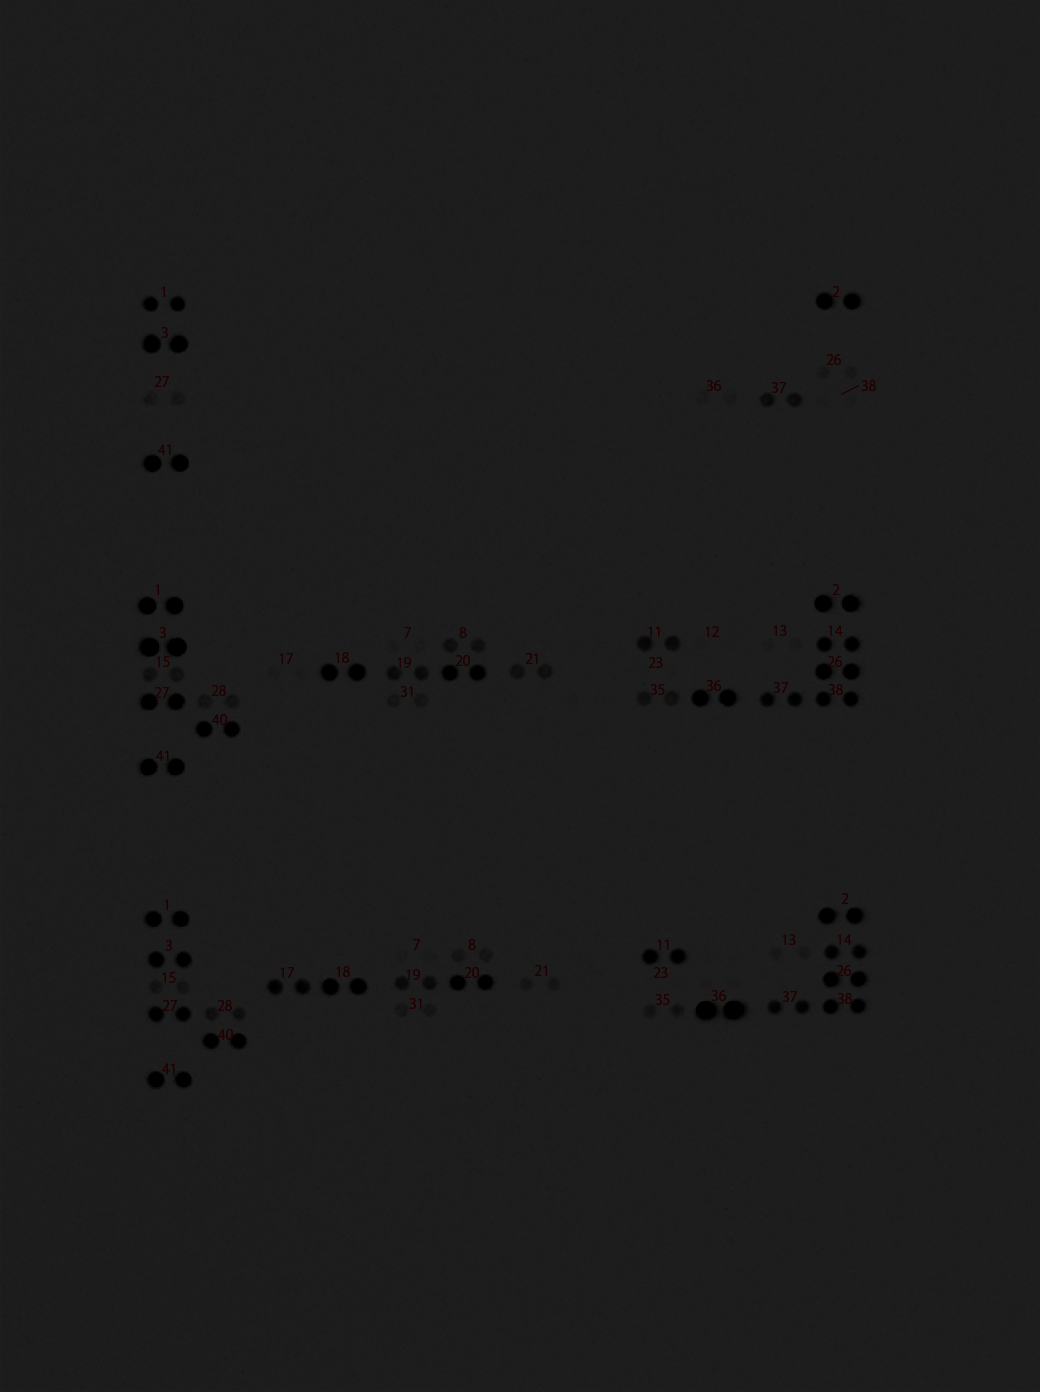

Supplement: Data S1 [file peerj-04-2231-s001.docx]
